# Supplementary material
Source: PubMed Central journal article supplement (PMC4499777)
Supplement: Supp_Figure1.pdf [file Supp_Figure1.pdf]

## Supplementary Data

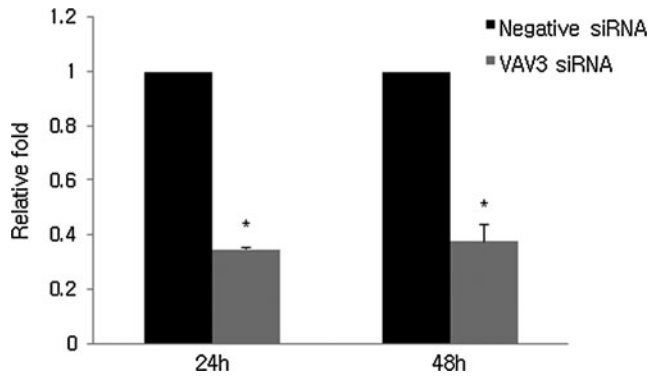

**SUPPLEMENTARY FIG. S1.** Knockdown efficiency of *VAV3* by siRNA treatment in SKpac cells. SKpac cells were transiently transfected with *VAV3* siRNA or negative siRNA for 24 and 48 h and examined for gene expression using quantitative real-time polymerase chain reaction. The mRNA levels of *VAV3* decreased to 35% at 24 h and 38% at 48 h compared with cells treated with negative siRNA (\* $P < 0.005$ ).
