# Supplementary material
Source: PubMed Central journal article supplement (PMC4499777)
Supplement: Supp_Table1.pdf [file Supp_Table1.pdf]

SUPPLEMENTARY TABLE S1. SEQUENCES OF VAV3  
siRNA AND NEGATIVE siRNA

| <i>Gene</i> | <i>Strand</i> | <i>Sequence</i>                      |
|-------------|---------------|--------------------------------------|
| VAV3        | Sense         | AUA UUC UCC UGA CUC UUU<br>GGU CCU G |
|             | Antisense     | CAG GAC CAA AGA GUC AGG<br>AGA AUA U |
| Negative    | Sense         | UUC UCC GAA CGU GUC ACG              |
|             | Antisense     | ACG UGA CAC GUU CGG AGA              |
